# Supplementary material for: Effects of Pretreatment and Drying on the Volatile Compounds of Sliced Solar-Dried Ginger (Zingiber officinale Roscoe) Rhizome
Source: Hindawi journal article supplement (doi:10.1155/2022/1274679), 2022-01-08
Supplement: f1 [file 1274679.f1.docx]

**Appendix 1: Environmental conditions of the solar drying**

Appendix 1a: Environmental conditions of the right side of the tent-like concrete solar dryer (CSD)

Appendix 1b: Environmental conditions of the left side of the tent-like concrete solar dryer (CSD)

Appendix 1c: Environmental conditions of the open-sun drying (OSD)

**Appendix 2: Chromatograms of the volatile compounds of HS-SPME/ GC-MS/MS analysis of ginger rhizome**

**
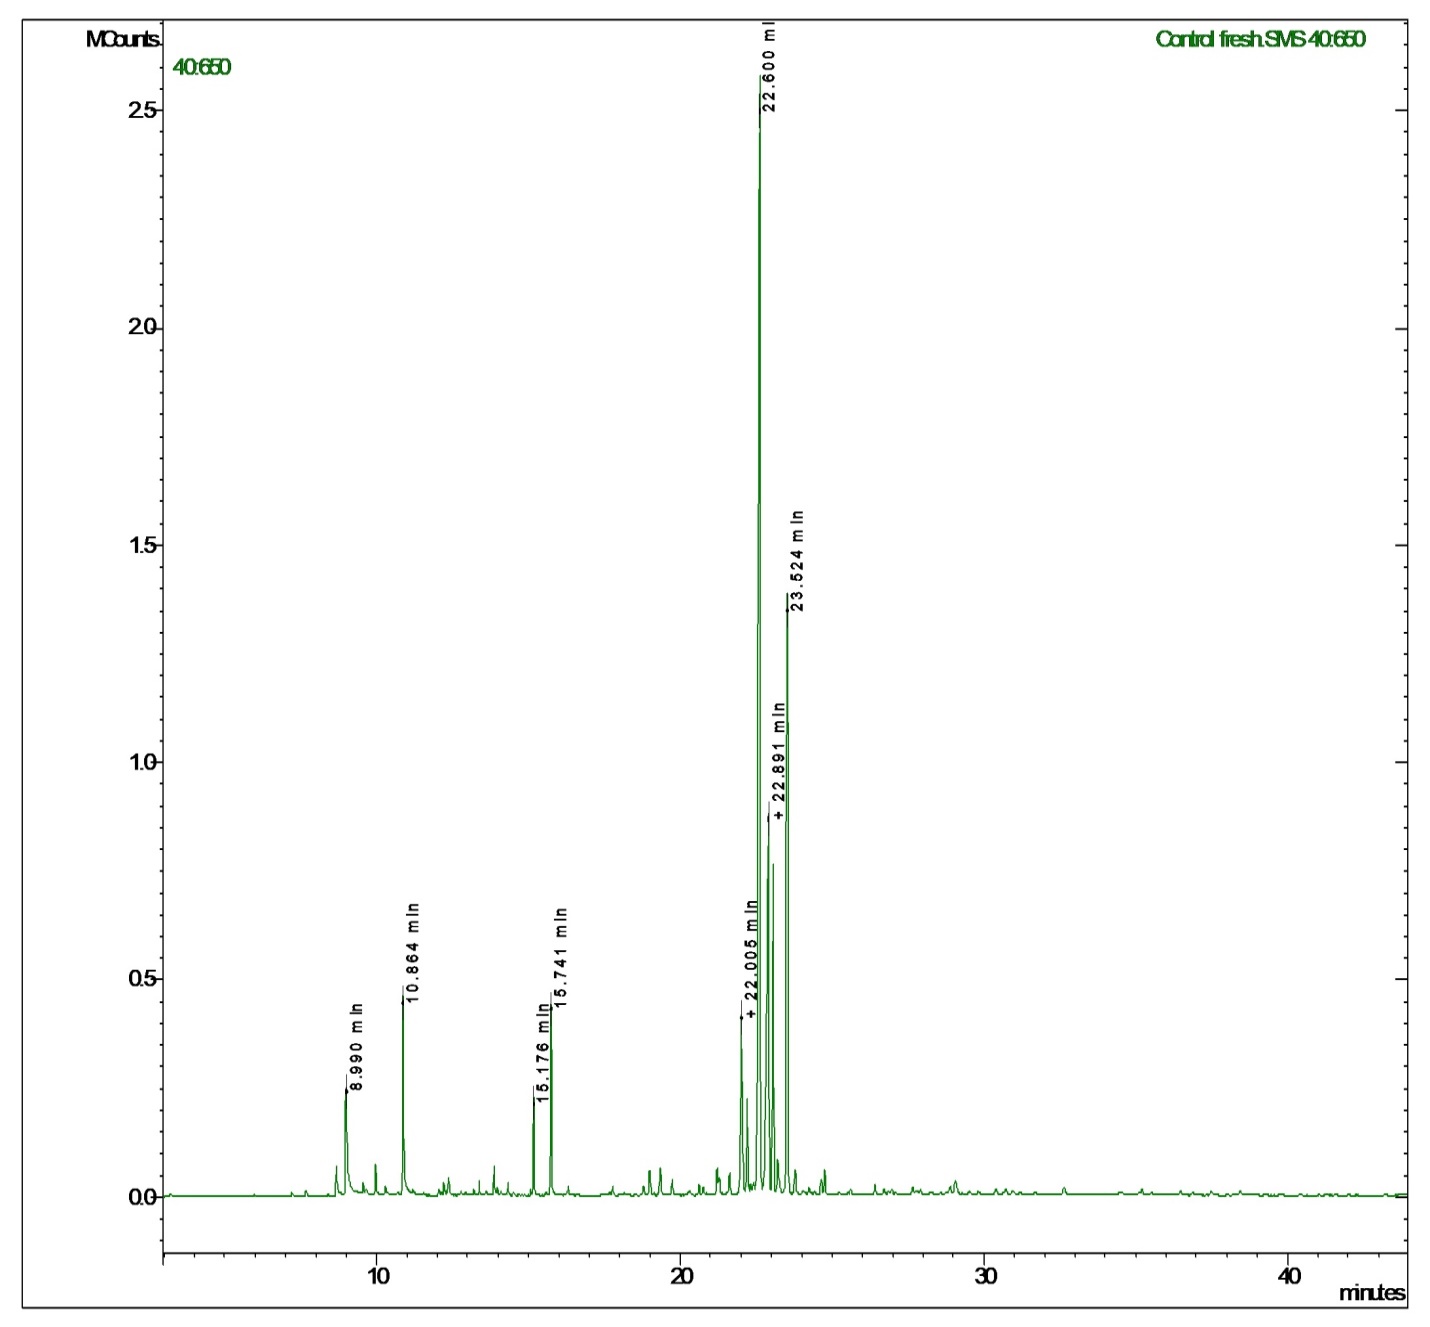
**

Appendix 2a: Chromatogram of the 0.0% (control) fresh ginger

**
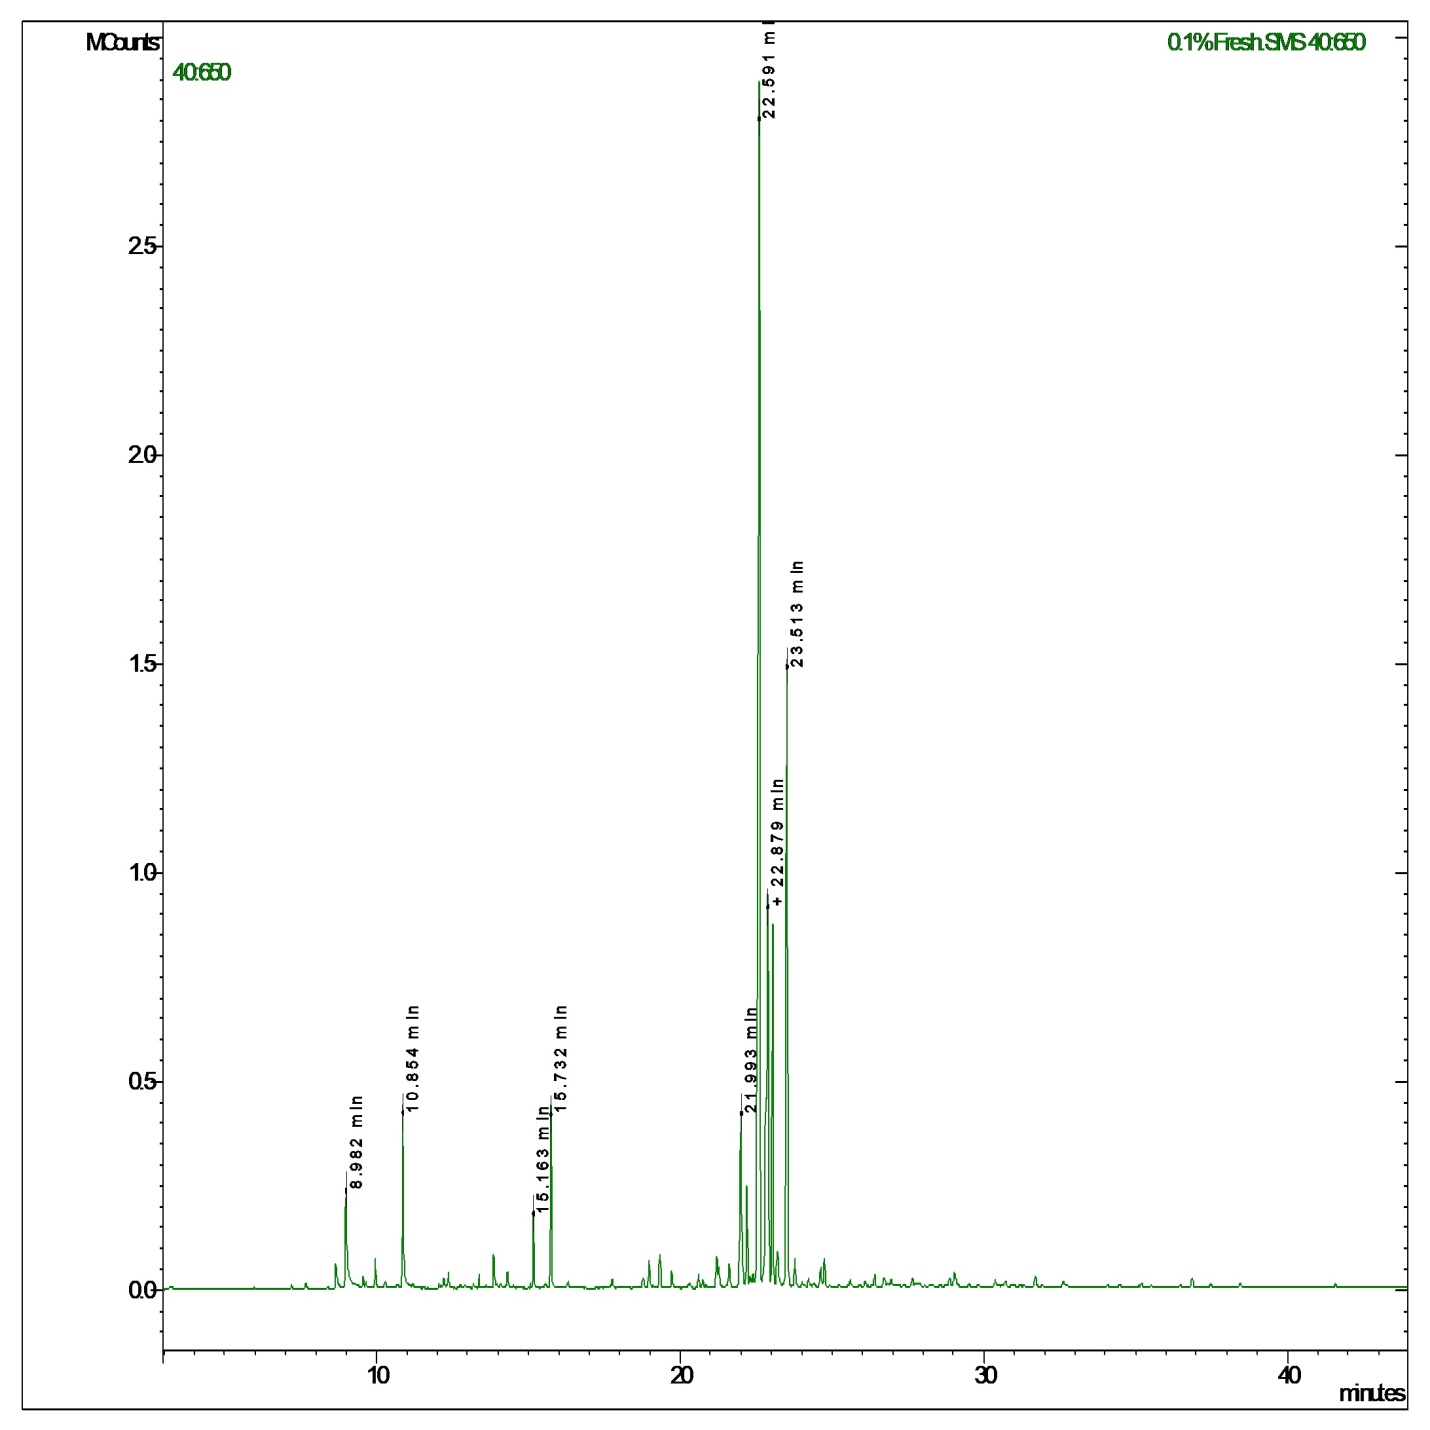
**

Appendix 2b: Chromatogram of the 0.1% fresh ginger

**
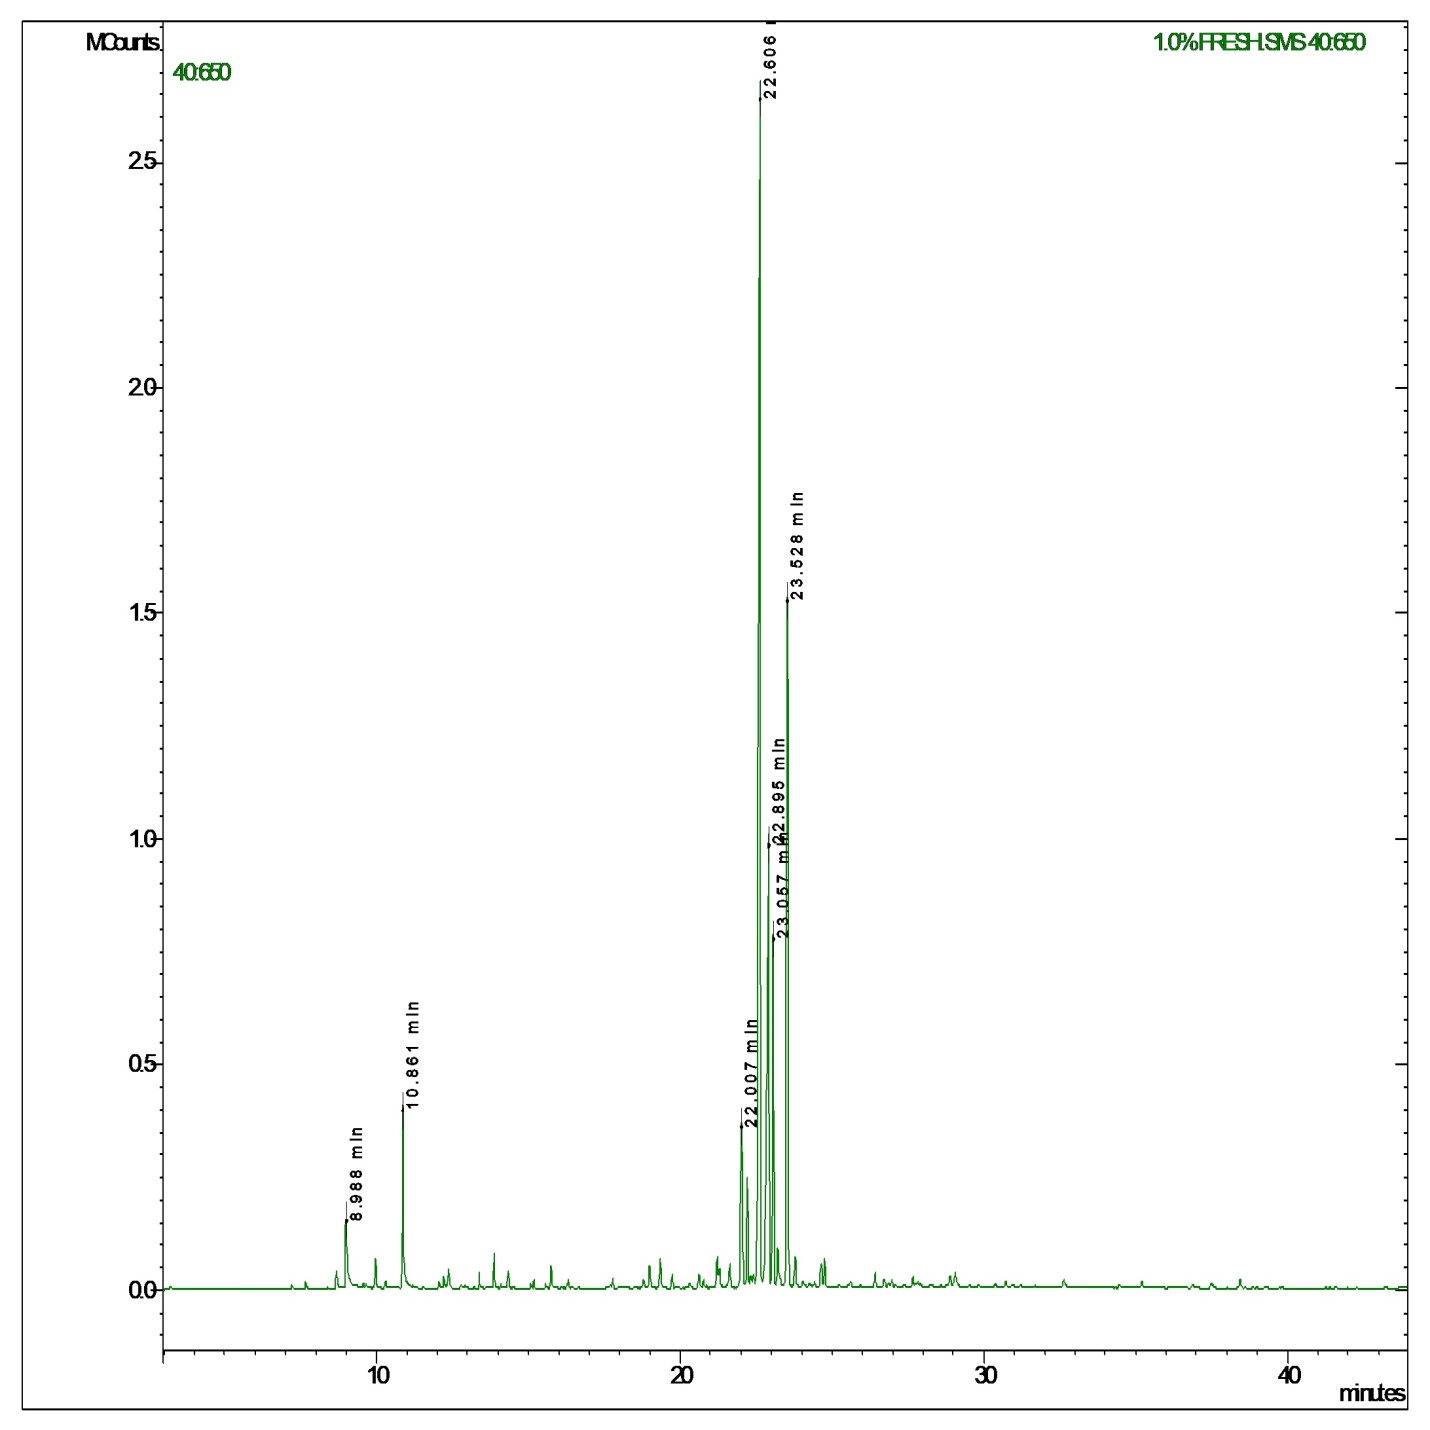
**

Appendix 2c: Chromatogram of the 1.0% fresh ginger

**
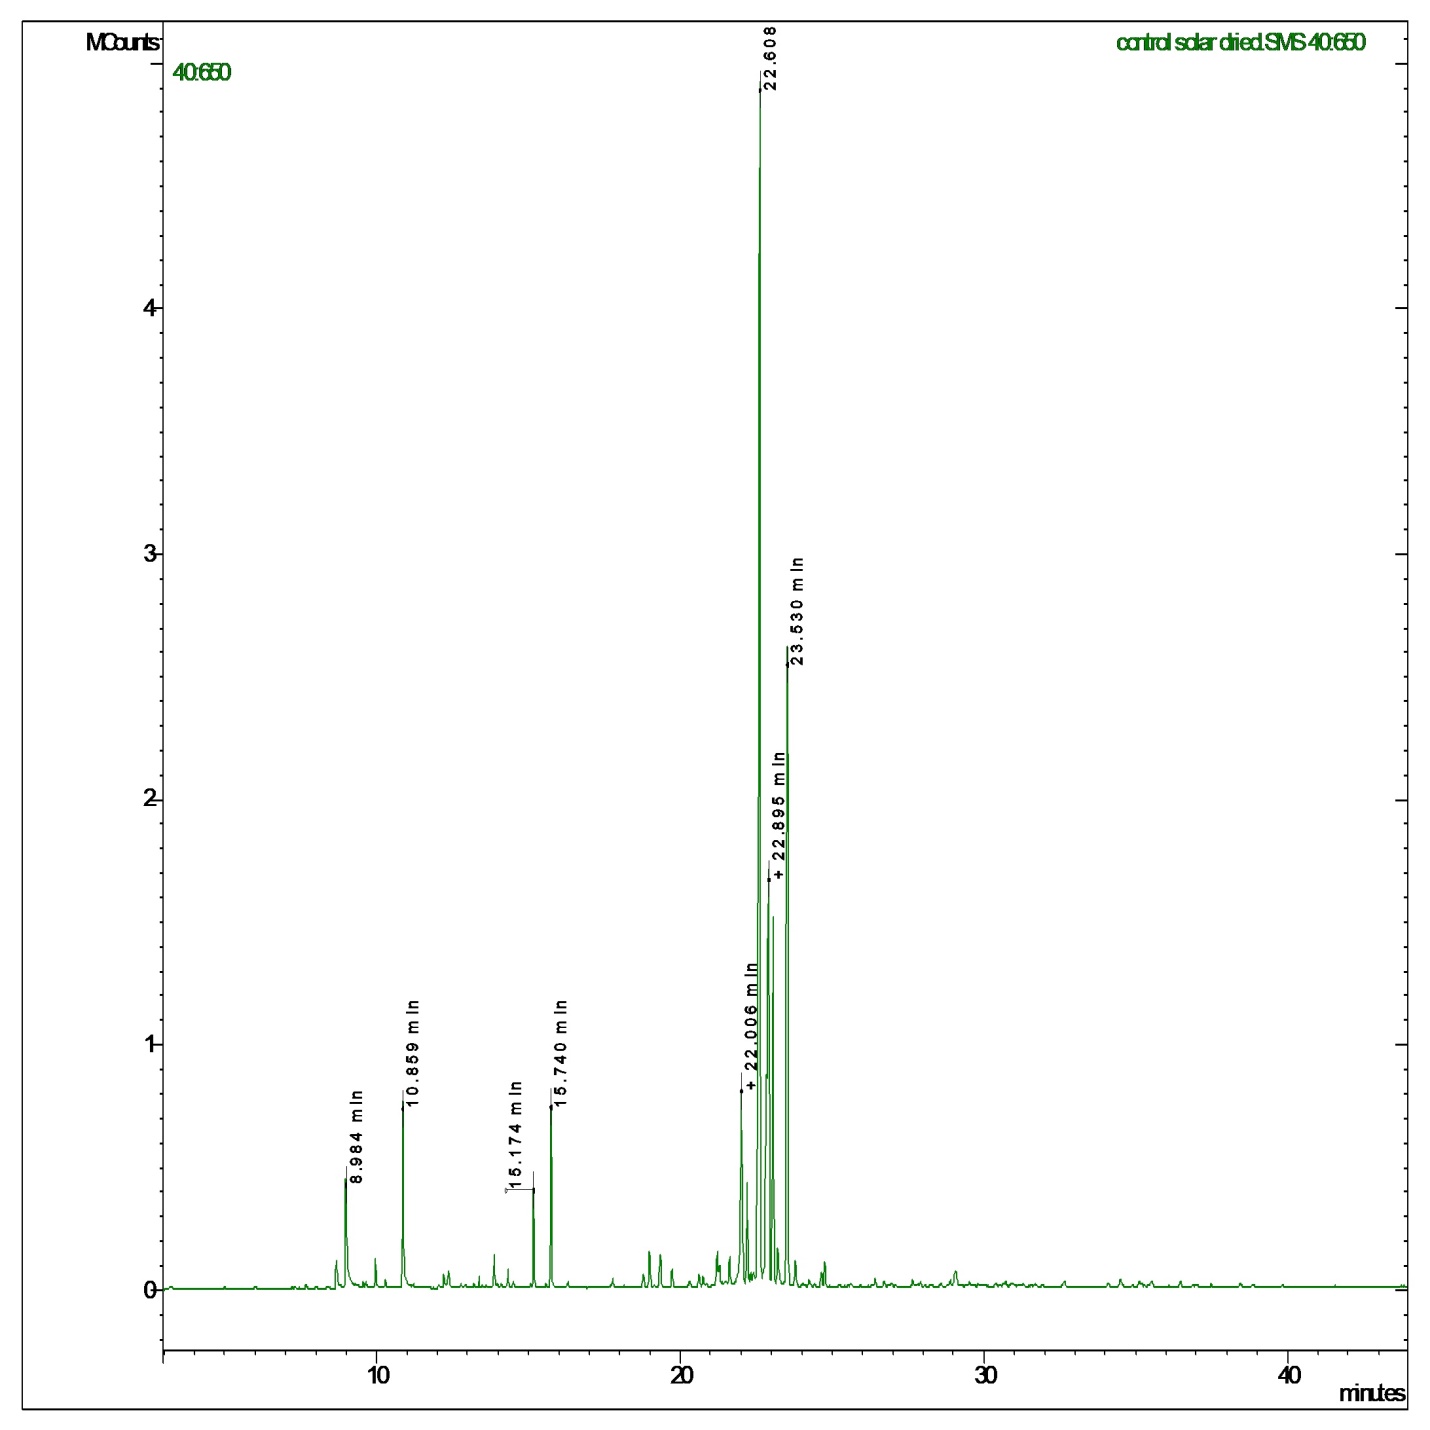
**

Appendix 2d: Chromatogram of the 0.0% Concrete solar dried ginger

**
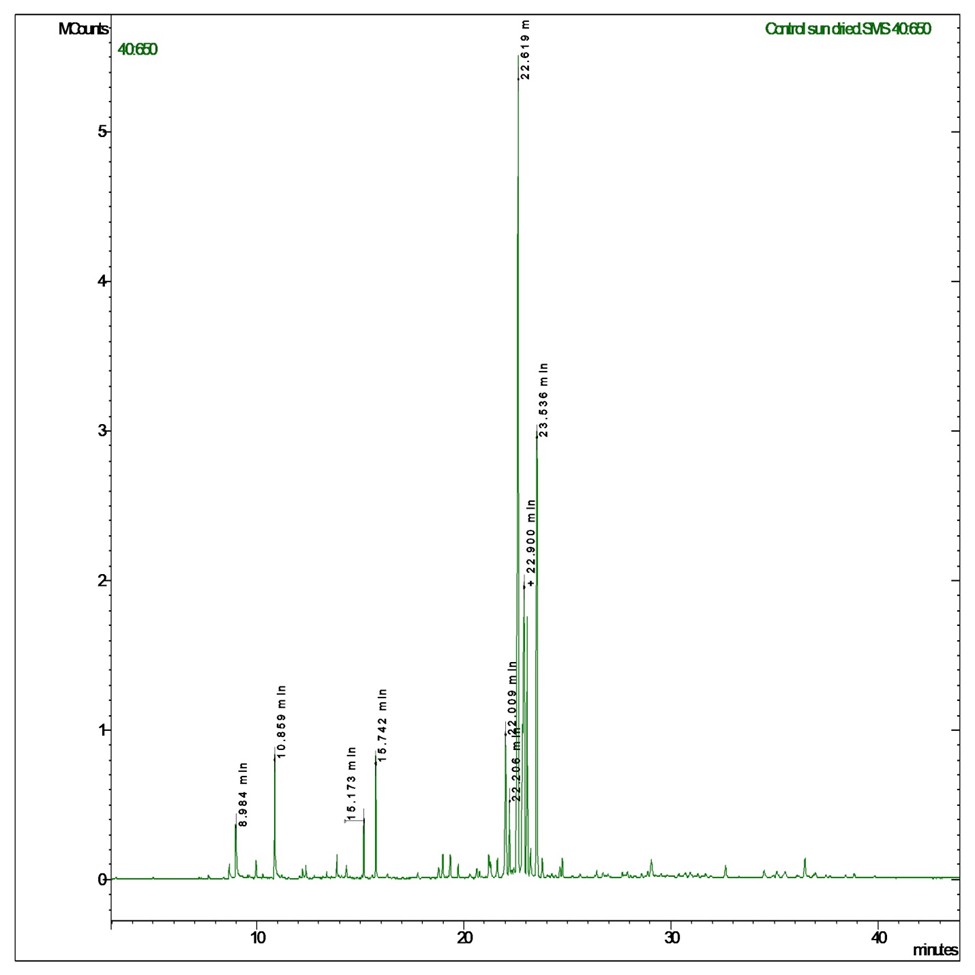
**

Appendix 2e: Chromatogram of the 0.0% (control) open sun dried ginger

**
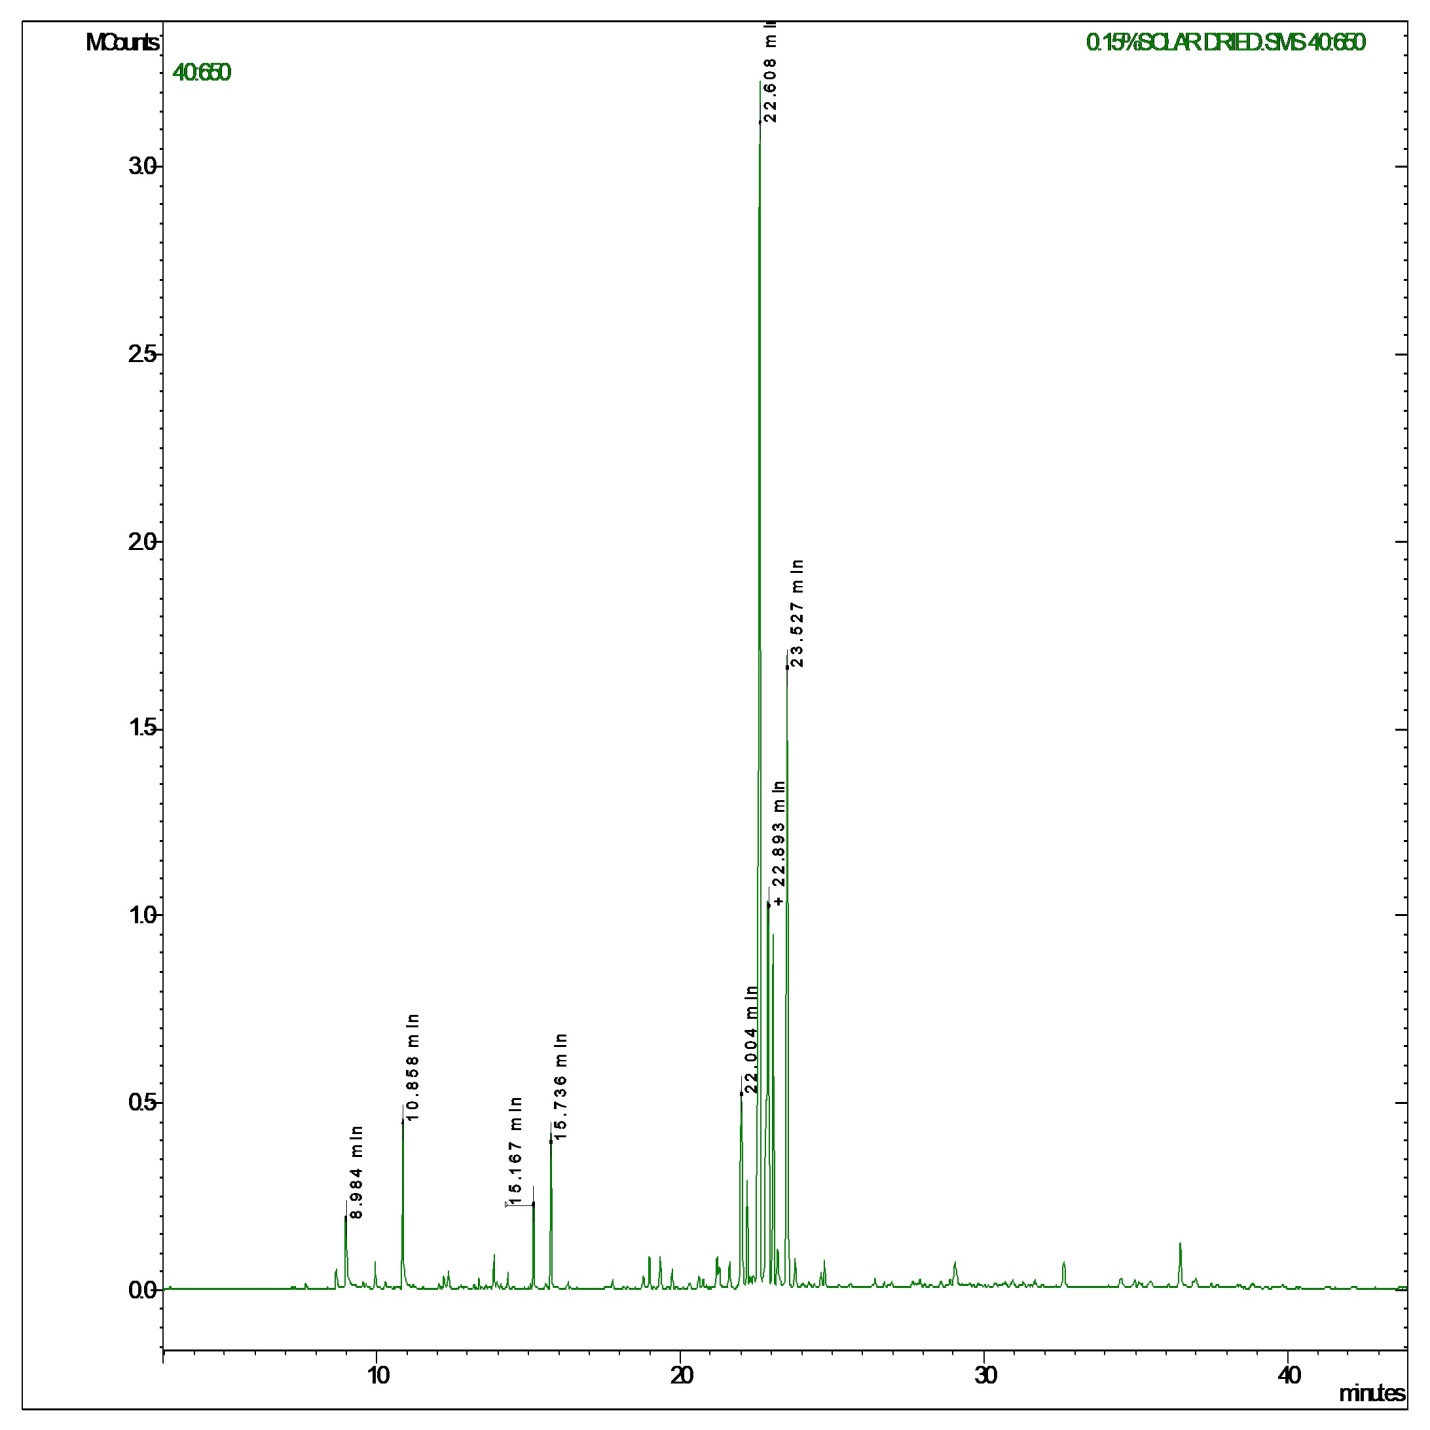
**

Appendix 2f: Chromatogram of the 0.15% concrete solar dried ginger
